# Supplementary material for: Does arterial hypertension influence the onset of Huntington's disease?
Source: PubMed Central journal article supplement (PMC5965871; doi:10.1371/journal.pone.0197975), 2018-05-23
Supplement: pone.0197975.s001.pdf [file pone.0197975.s001.pdf]

**S1 Table. 630 European adult-onset HD patient dataset.** Age: patient’s age at the time of data collection; Sex: M (male) and F (female); CAGexp: CAG number repeat in expanded allele; mAO: motor onset, age of the first motor symptoms; AHT condition: normotensive (patient without arterial hypertension record), with AHT (patient with arterial hypertension records) and pre-HD AHT (patient with arterial hypertension records who manifested hypertension before HD symptoms).

| Patient | Age | Sex | CAGexp | mAO | AHT condition |
|---------|-----|-----|--------|-----|---------------|
| 1       | 54  | M   | 43     | 50  | Normotensive  |
| 2       | 42  | M   | 47     | 36  | Normotensive  |
| 3       | 63  | M   | 41     | 57  | Normotensive  |
| 4       | 55  | F   | 43     | 48  | Normotensive  |
| 5       | 32  | M   | 47     | 28  | Normotensive  |
| 6       | 67  | M   | 41     | 58  | Normotensive  |
| 7       | 60  | F   | 43     | 54  | Normotensive  |
| 8       | 50  | F   | 43     | 49  | Normotensive  |
| 9       | 52  | F   | 44     | 32  | Normotensive  |
| 10      | 59  | F   | 42     | 59  | With AHT      |
| 11      | 69  | M   | 41     | 61  | Normotensive  |
| 12      | 59  | M   | 42     | 56  | Normotensive  |
| 13      | 26  | M   | 50     | 22  | Normotensive  |
| 14      | 40  | M   | 45     | 34  | Normotensive  |
| 15      | 62  | F   | 41     | 60  | Normotensive  |
| 16      | 48  | F   | 43     | 47  | Normotensive  |
| 17      | 44  | F   | 46     | 32  | Normotensive  |
| 18      | 46  | M   | 45     | 38  | Normotensive  |
| 19      | 43  | M   | 47     | 36  | Normotensive  |
| 20      | 45  | F   | 46     | 27  | Normotensive  |
| 21      | 35  | F   | 49     | 28  | Normotensive  |
| 22      | 55  | F   | 45     | 41  | Normotensive  |
| 23      | 69  | F   | 41     | 67  | Normotensive  |
| 24      | 32  | M   | 47     | 24  | Normotensive  |
| 25      | 45  | M   | 43     | 43  | Normotensive  |
| 26      | 47  | F   | 44     | 42  | Normotensive  |
| 27      | 68  | M   | 40     | 57  | Normotensive  |
| 28      | 54  | F   | 41     | 53  | Normotensive  |
| 29      | 38  | M   | 46     | 30  | Normotensive  |
| 30      | 40  | M   | 46     | 32  | Normotensive  |
| 31      | 57  | F   | 47     | 35  | Normotensive  |
| 32      | 60  | M   | 43     | 50  | Normotensive  |
| 33      | 54  | M   | 43     | 43  | Normotensive  |
| 34      | 46  | M   | 47     | 44  | Normotensive  |
| 35      | 45  | F   | 47     | 35  | Normotensive  |
| 36      | 63  | M   | 43     | 59  | Pre-HD AHT    |
| 37      | 56  | F   | 43     | 48  | Normotensive  |
| 38      | 57  | M   | 42     | 51  | Normotensive  |

|    |    |   |    |    |              |
|----|----|---|----|----|--------------|
| 39 | 28 | F | 50 | 28 | Normotensive |
| 40 | 72 | F | 43 | 55 | Normotensive |
| 41 | 39 | M | 44 | 24 | Normotensive |
| 42 | 44 | F | 45 | 41 | Normotensive |
| 43 | 52 | F | 44 | 39 | Normotensive |
| 44 | 55 | F | 42 | 46 | Normotensive |
| 45 | 38 | F | 44 | 30 | Normotensive |
| 46 | 61 | M | 40 | 57 | Normotensive |
| 47 | 36 | M | 48 | 32 | Normotensive |
| 48 | 57 | M | 43 | 49 | With AHT     |
| 49 | 67 | M | 41 | 61 | Normotensive |
| 50 | 59 | F | 42 | 51 | Normotensive |
| 51 | 62 | F | 42 | 54 | Normotensive |
| 52 | 38 | M | 43 | 41 | Normotensive |
| 53 | 42 | F | 45 | 36 | Normotensive |
| 54 | 77 | F | 40 | 65 | Normotensive |
| 55 | 42 | M | 45 | 37 | Normotensive |
| 56 | 73 | M | 40 | 63 | Normotensive |
| 57 | 48 | F | 42 | 31 | Normotensive |
| 58 | 62 | F | 40 | 59 | Normotensive |
| 59 | 42 | M | 48 | 26 | Normotensive |
| 60 | 52 | M | 43 | 46 | Normotensive |
| 61 | 40 | F | 47 | 35 | Normotensive |
| 62 | 43 | F | 49 | 35 | Normotensive |
| 63 | 38 | M | 50 | 36 | With AHT     |
| 64 | 56 | M | 45 | 47 | Normotensive |
| 65 | 76 | F | 41 | 55 | Normotensive |
| 66 | 60 | F | 43 | 47 | Normotensive |
| 67 | 61 | M | 42 | 44 | With AHT     |
| 68 | 55 | F | 41 | 52 | Normotensive |
| 69 | 33 | M | 49 | 25 | Normotensive |
| 70 | 37 | M | 46 | 34 | Normotensive |
| 71 | 77 | F | 41 | 68 | Normotensive |
| 72 | 50 | F | 42 | 49 | Normotensive |
| 73 | 67 | F | 43 | 56 | Normotensive |
| 74 | 39 | F | 48 | 31 | Normotensive |
| 75 | 65 | F | 41 | 57 | Normotensive |
| 76 | 57 | F | 42 | 49 | Normotensive |
| 77 | 40 | F | 47 | 39 | Normotensive |
| 78 | 49 | M | 43 | 45 | Normotensive |
| 79 | 41 | F | 47 | 32 | Normotensive |
| 80 | 54 | M | 42 | 51 | Normotensive |
| 81 | 53 | F | 43 | 50 | Normotensive |
| 82 | 56 | M | 44 | 41 | Normotensive |
| 83 | 63 | M | 41 | 52 | Normotensive |
| 84 | 60 | F | 40 | 49 | Normotensive |
| 85 | 48 | M | 43 | 45 | Pre-HD AHT   |
| 86 | 64 | M | 42 | 44 | Normotensive |

|     |    |   |    |    |              |
|-----|----|---|----|----|--------------|
| 87  | 67 | F | 42 | 63 | Normotensive |
| 88  | 42 | M | 46 | 35 | Normotensive |
| 89  | 34 | F | 50 | 21 | Normotensive |
| 90  | 39 | F | 46 | 34 | Normotensive |
| 91  | 52 | F | 40 | 48 | Normotensive |
| 92  | 48 | F | 43 | 46 | Normotensive |
| 93  | 40 | M | 46 | 37 | Normotensive |
| 94  | 40 | F | 46 | 37 | Normotensive |
| 95  | 63 | M | 40 | 52 | Normotensive |
| 96  | 36 | F | 46 | 34 | Normotensive |
| 97  | 40 | F | 45 | 31 | Normotensive |
| 98  | 47 | M | 46 | 38 | Normotensive |
| 99  | 41 | M | 47 | 28 | Normotensive |
| 100 | 58 | M | 42 | 56 | Normotensive |
| 101 | 50 | F | 45 | 49 | Normotensive |
| 102 | 44 | M | 47 | 38 | Normotensive |
| 103 | 46 | M | 46 | 41 | Normotensive |
| 104 | 54 | M | 44 | 41 | Normotensive |
| 105 | 48 | M | 43 | 47 | Normotensive |
| 106 | 52 | F | 45 | 47 | Normotensive |
| 107 | 61 | M | 42 | 57 | Normotensive |
| 108 | 58 | F | 43 | 53 | Normotensive |
| 109 | 54 | M | 41 | 48 | Normotensive |
| 110 | 63 | F | 43 | 57 | Normotensive |
| 111 | 52 | M | 42 | 46 | Normotensive |
| 112 | 82 | M | 40 | 70 | Pre-HD AHT   |
| 113 | 59 | F | 40 | 55 | Normotensive |
| 114 | 45 | M | 44 | 41 | Normotensive |
| 115 | 72 | M | 43 | 54 | Normotensive |
| 116 | 67 | F | 42 | 60 | Normotensive |
| 117 | 45 | M | 45 | 43 | With AHT     |
| 118 | 36 | M | 45 | 35 | Normotensive |
| 119 | 49 | F | 45 | 41 | Normotensive |
| 120 | 52 | F | 40 | 42 | Normotensive |
| 121 | 76 | M | 42 | 55 | Normotensive |
| 122 | 65 | M | 45 | 60 | Normotensive |
| 123 | 69 | M | 40 | 66 | Normotensive |
| 124 | 36 | M | 50 | 32 | Normotensive |
| 125 | 48 | F | 45 | 22 | Normotensive |
| 126 | 66 | F | 42 | 60 | Normotensive |
| 127 | 43 | F | 44 | 43 | Pre-HD AHT   |
| 128 | 47 | F | 40 | 46 | Normotensive |
| 129 | 61 | M | 41 | 60 | Normotensive |
| 130 | 61 | F | 41 | 60 | Normotensive |
| 131 | 70 | F | 40 | 64 | Pre-HD AHT   |
| 132 | 74 | M | 40 | 68 | Normotensive |
| 133 | 49 | F | 44 | 41 | Normotensive |
| 134 | 62 | F | 43 | 53 | Normotensive |

|     |    |   |    |    |              |
|-----|----|---|----|----|--------------|
| 135 | 55 | F | 44 | 47 | With AHT     |
| 136 | 54 | F | 43 | 52 | Normotensive |
| 137 | 47 | F | 44 | 43 | Normotensive |
| 138 | 39 | F | 44 | 32 | Normotensive |
| 139 | 44 | F | 46 | 38 | Normotensive |
| 140 | 31 | M | 48 | 31 | Normotensive |
| 141 | 68 | M | 43 | 54 | Normotensive |
| 142 | 47 | M | 44 | 37 | Normotensive |
| 143 | 31 | F | 50 | 35 | With AHT     |
| 144 | 46 | M | 45 | 42 | Normotensive |
| 145 | 58 | F | 41 | 56 | Pre-HD AHT   |
| 146 | 42 | F | 43 | 39 | Normotensive |
| 147 | 72 | M | 41 | 62 | Normotensive |
| 148 | 62 | M | 42 | 58 | Normotensive |
| 149 | 58 | F | 44 | 47 | Normotensive |
| 150 | 34 | M | 46 | 32 | Normotensive |
| 151 | 43 | M | 46 | 32 | Normotensive |
| 152 | 61 | F | 42 | 53 | Normotensive |
| 153 | 64 | M | 41 | 61 | Normotensive |
| 154 | 63 | M | 44 | 52 | Normotensive |
| 155 | 34 | M | 48 | 31 | Normotensive |
| 156 | 49 | F | 44 | 47 | Normotensive |
| 157 | 62 | F | 42 | 53 | Normotensive |
| 158 | 51 | F | 44 | 48 | Normotensive |
| 159 | 39 | F | 43 | 42 | Normotensive |
| 160 | 44 | M | 44 | 38 | Normotensive |
| 161 | 44 | F | 48 | 37 | Normotensive |
| 162 | 57 | F | 43 | 37 | With AHT     |
| 163 | 64 | F | 42 | 56 | Normotensive |
| 164 | 52 | F | 44 | 40 | Normotensive |
| 165 | 44 | M | 43 | 39 | Normotensive |
| 166 | 61 | M | 42 | 44 | Normotensive |
| 167 | 63 | M | 42 | 45 | Normotensive |
| 168 | 45 | F | 44 | 37 | Normotensive |
| 169 | 42 | M | 48 | 37 | Normotensive |
| 170 | 35 | F | 45 | 34 | Normotensive |
| 171 | 72 | F | 42 | 63 | Normotensive |
| 172 | 32 | F | 48 | 28 | Normotensive |
| 173 | 67 | F | 40 | 60 | Normotensive |
| 174 | 59 | F | 43 | 48 | Normotensive |
| 175 | 54 | M | 42 | 40 | With AHT     |
| 176 | 41 | M | 47 | 45 | Normotensive |
| 177 | 64 | F | 42 | 48 | With AHT     |
| 178 | 42 | M | 45 | 38 | Normotensive |
| 179 | 63 | F | 42 | 60 | Pre-HD AHT   |
| 180 | 35 | M | 44 | 38 | Normotensive |
| 181 | 57 | M | 44 | 48 | Normotensive |
| 182 | 45 | F | 48 | 34 | Normotensive |

|     |    |   |    |    |              |
|-----|----|---|----|----|--------------|
| 183 | 43 | F | 47 | 34 | Normotensive |
| 184 | 45 | F | 44 | 39 | Normotensive |
| 185 | 57 | M | 44 | 43 | Normotensive |
| 186 | 61 | M | 41 | 57 | Normotensive |
| 187 | 58 | F | 45 | 56 | Normotensive |
| 188 | 44 | F | 45 | 36 | Normotensive |
| 189 | 48 | F | 43 | 48 | Normotensive |
| 190 | 69 | M | 42 | 61 | With AHT     |
| 191 | 75 | F | 40 | 66 | Normotensive |
| 192 | 60 | M | 40 | 57 | Normotensive |
| 193 | 40 | F | 46 | 37 | Normotensive |
| 194 | 66 | M | 41 | 65 | Normotensive |
| 195 | 43 | M | 47 | 34 | Normotensive |
| 196 | 41 | M | 45 | 35 | Normotensive |
| 197 | 42 | F | 44 | 38 | Normotensive |
| 198 | 28 | M | 48 | 26 | Normotensive |
| 199 | 41 | M | 45 | 37 | With AHT     |
| 200 | 27 | M | 49 | 25 | Normotensive |
| 201 | 41 | M | 46 | 37 | Normotensive |
| 202 | 44 | M | 44 | 42 | Normotensive |
| 203 | 39 | F | 48 | 32 | Normotensive |
| 204 | 55 | M | 43 | 47 | Normotensive |
| 205 | 63 | F | 43 | 50 | With AHT     |
| 206 | 40 | F | 48 | 32 | Normotensive |
| 207 | 69 | M | 41 | 67 | Pre-HD AHT   |
| 208 | 53 | M | 43 | 48 | Normotensive |
| 209 | 48 | F | 44 | 42 | Normotensive |
| 210 | 62 | F | 43 | 41 | Normotensive |
| 211 | 47 | M | 45 | 47 | Normotensive |
| 212 | 56 | F | 43 | 45 | Normotensive |
| 213 | 29 | F | 46 | 35 | With AHT     |
| 214 | 37 | F | 47 | 34 | Normotensive |
| 215 | 36 | M | 47 | 36 | Normotensive |
| 216 | 53 | M | 42 | 48 | Normotensive |
| 217 | 50 | M | 47 | 44 | Normotensive |
| 218 | 39 | M | 44 | 38 | Normotensive |
| 219 | 54 | F | 43 | 48 | Normotensive |
| 220 | 53 | M | 43 | 49 | Normotensive |
| 221 | 57 | M | 42 | 54 | Pre-HD AHT   |
| 222 | 51 | M | 44 | 46 | Normotensive |
| 223 | 66 | F | 41 | 61 | Normotensive |
| 224 | 59 | F | 42 | 57 | Normotensive |
| 225 | 63 | F | 42 | 61 | Normotensive |
| 226 | 48 | F | 47 | 32 | Normotensive |
| 227 | 49 | M | 40 | 49 | Normotensive |
| 228 | 53 | M | 42 | 47 | Normotensive |
| 229 | 39 | F | 48 | 31 | Normotensive |
| 230 | 58 | F | 43 | 57 | Pre-HD AHT   |

|     |    |   |    |    |              |
|-----|----|---|----|----|--------------|
| 231 | 51 | F | 41 | 52 | Normotensive |
| 232 | 58 | M | 42 | 53 | Normotensive |
| 233 | 69 | M | 41 | 57 | Pre-HD AHT   |
| 234 | 47 | M | 44 | 32 | Normotensive |
| 235 | 26 | M | 49 | 28 | Normotensive |
| 236 | 50 | F | 48 | 41 | With AHT     |
| 237 | 43 | M | 45 | 41 | With AHT     |
| 238 | 40 | M | 47 | 37 | Normotensive |
| 239 | 72 | M | 41 | 68 | Normotensive |
| 240 | 58 | M | 44 | 57 | Normotensive |
| 241 | 65 | F | 42 | 61 | Normotensive |
| 242 | 63 | M | 42 | 53 | With AHT     |
| 243 | 49 | F | 43 | 47 | Normotensive |
| 244 | 52 | F | 42 | 41 | Normotensive |
| 245 | 81 | F | 40 | 75 | Normotensive |
| 246 | 53 | F | 43 | 52 | Normotensive |
| 247 | 43 | M | 44 | 37 | Normotensive |
| 248 | 47 | F | 44 | 41 | Normotensive |
| 249 | 47 | F | 42 | 46 | Normotensive |
| 250 | 40 | M | 47 | 38 | Normotensive |
| 251 | 58 | F | 42 | 49 | Normotensive |
| 252 | 64 | M | 42 | 61 | Normotensive |
| 253 | 54 | M | 43 | 49 | Normotensive |
| 254 | 41 | M | 43 | 43 | Normotensive |
| 255 | 40 | M | 45 | 41 | Normotensive |
| 256 | 62 | F | 42 | 49 | Normotensive |
| 257 | 55 | F | 42 | 44 | Normotensive |
| 258 | 65 | F | 40 | 65 | Normotensive |
| 259 | 51 | M | 46 | 48 | Normotensive |
| 260 | 53 | M | 42 | 49 | Normotensive |
| 261 | 52 | F | 44 | 40 | Normotensive |
| 262 | 55 | M | 44 | 50 | Normotensive |
| 263 | 66 | F | 43 | 61 | Normotensive |
| 264 | 43 | M | 43 | 44 | Normotensive |
| 265 | 65 | F | 43 | 59 | Normotensive |
| 266 | 46 | F | 46 | 44 | Normotensive |
| 267 | 74 | M | 40 | 55 | With AHT     |
| 268 | 34 | F | 49 | 32 | Normotensive |
| 269 | 36 | M | 48 | 36 | Normotensive |
| 270 | 47 | F | 44 | 43 | Normotensive |
| 271 | 52 | F | 40 | 45 | With AHT     |
| 272 | 56 | M | 42 | 51 | Normotensive |
| 273 | 47 | F | 44 | 38 | Normotensive |
| 274 | 38 | M | 47 | 35 | Normotensive |
| 275 | 39 | M | 46 | 34 | Normotensive |
| 276 | 42 | M | 46 | 38 | Normotensive |
| 277 | 69 | F | 40 | 59 | Normotensive |
| 278 | 73 | M | 41 | 68 | Normotensive |

|     |    |   |    |    |              |
|-----|----|---|----|----|--------------|
| 279 | 69 | F | 41 | 61 | With AHT     |
| 280 | 49 | F | 45 | 39 | Normotensive |
| 281 | 39 | F | 47 | 38 | Normotensive |
| 282 | 54 | F | 45 | 35 | Normotensive |
| 283 | 34 | F | 48 | 34 | Normotensive |
| 284 | 51 | F | 44 | 46 | Normotensive |
| 285 | 57 | M | 45 | 40 | With AHT     |
| 286 | 57 | M | 43 | 51 | Normotensive |
| 287 | 55 | F | 41 | 53 | Normotensive |
| 288 | 46 | M | 40 | 36 | Normotensive |
| 289 | 49 | F | 44 | 46 | Normotensive |
| 290 | 38 | F | 47 | 31 | Normotensive |
| 291 | 65 | F | 41 | 58 | Normotensive |
| 292 | 44 | M | 45 | 44 | Normotensive |
| 293 | 61 | M | 42 | 53 | With AHT     |
| 294 | 61 | M | 43 | 55 | Pre-HD AHT   |
| 295 | 45 | F | 42 | 41 | Normotensive |
| 296 | 40 | M | 41 | 43 | Normotensive |
| 297 | 61 | M | 42 | 57 | Pre-HD AHT   |
| 298 | 63 | F | 42 | 55 | Normotensive |
| 299 | 64 | F | 41 | 62 | Normotensive |
| 300 | 52 | M | 44 | 44 | Normotensive |
| 301 | 37 | M | 46 | 35 | Normotensive |
| 302 | 55 | M | 41 | 47 | With AHT     |
| 303 | 66 | F | 41 | 58 | Pre-HD AHT   |
| 304 | 36 | M | 48 | 31 | Normotensive |
| 305 | 47 | M | 45 | 30 | Normotensive |
| 306 | 50 | M | 48 | 30 | Normotensive |
| 307 | 51 | M | 44 | 51 | With AHT     |
| 308 | 48 | M | 44 | 47 | Normotensive |
| 309 | 49 | M | 44 | 48 | Normotensive |
| 310 | 33 | M | 49 | 31 | Normotensive |
| 311 | 57 | M | 41 | 52 | Normotensive |
| 312 | 68 | M | 41 | 57 | Normotensive |
| 313 | 58 | F | 43 | 48 | Normotensive |
| 314 | 42 | M | 47 | 39 | Normotensive |
| 315 | 49 | M | 43 | 46 | With AHT     |
| 316 | 36 | F | 50 | 32 | Normotensive |
| 317 | 68 | F | 44 | 66 | Normotensive |
| 318 | 41 | F | 46 | 39 | Normotensive |
| 319 | 55 | F | 42 | 52 | Normotensive |
| 320 | 66 | M | 42 | 55 | Normotensive |
| 321 | 48 | F | 45 | 40 | With AHT     |
| 322 | 57 | F | 42 | 57 | Normotensive |
| 323 | 58 | F | 42 | 48 | Normotensive |
| 324 | 65 | M | 41 | 49 | Normotensive |
| 325 | 36 | M | 48 | 36 | Normotensive |
| 326 | 41 | F | 45 | 39 | Normotensive |

|     |    |   |    |    |              |
|-----|----|---|----|----|--------------|
| 327 | 74 | M | 41 | 64 | Normotensive |
| 328 | 48 | F | 48 | 46 | With AHT     |
| 329 | 30 | M | 50 | 28 | Pre-HD AHT   |
| 330 | 51 | F | 44 | 41 | Normotensive |
| 331 | 55 | F | 42 | 50 | Normotensive |
| 332 | 43 | M | 46 | 33 | Normotensive |
| 333 | 36 | F | 49 | 30 | Normotensive |
| 334 | 49 | F | 41 | 45 | Normotensive |
| 335 | 45 | F | 45 | 37 | Normotensive |
| 336 | 45 | F | 43 | 45 | Normotensive |
| 337 | 53 | F | 44 | 40 | Normotensive |
| 338 | 45 | M | 45 | 43 | Normotensive |
| 339 | 58 | M | 42 | 54 | Normotensive |
| 340 | 56 | F | 40 | 54 | Normotensive |
| 341 | 68 | F | 41 | 64 | Normotensive |
| 342 | 35 | F | 46 | 39 | Normotensive |
| 343 | 46 | M | 45 | 42 | Normotensive |
| 344 | 42 | M | 47 | 34 | Normotensive |
| 345 | 40 | M | 47 | 32 | Normotensive |
| 346 | 44 | F | 44 | 39 | Normotensive |
| 347 | 46 | M | 44 | 41 | Normotensive |
| 348 | 60 | F | 41 | 37 | Normotensive |
| 349 | 59 | F | 41 | 51 | Normotensive |
| 350 | 63 | M | 43 | 54 | Pre-HD AHT   |
| 351 | 45 | F | 46 | 45 | Normotensive |
| 352 | 48 | F | 42 | 44 | Normotensive |
| 353 | 33 | M | 47 | 28 | Normotensive |
| 354 | 42 | F | 46 | 38 | Normotensive |
| 355 | 50 | M | 46 | 35 | Normotensive |
| 356 | 63 | M | 43 | 49 | Normotensive |
| 357 | 52 | F | 41 | 51 | Normotensive |
| 358 | 66 | M | 45 | 56 | Normotensive |
| 359 | 65 | F | 42 | 47 | Normotensive |
| 360 | 57 | M | 42 | 30 | Pre-HD AHT   |
| 361 | 69 | M | 42 | 63 | Normotensive |
| 362 | 35 | F | 50 | 35 | Normotensive |
| 363 | 46 | M | 42 | 46 | Normotensive |
| 364 | 44 | M | 44 | 43 | Normotensive |
| 365 | 59 | M | 43 | 50 | Normotensive |
| 366 | 50 | M | 44 | 40 | Normotensive |
| 367 | 56 | M | 42 | 50 | Normotensive |
| 368 | 66 | F | 47 | 63 | Normotensive |
| 369 | 67 | M | 42 | 58 | Normotensive |
| 370 | 52 | M | 43 | 50 | Normotensive |
| 371 | 47 | M | 45 | 44 | Normotensive |
| 372 | 58 | F | 43 | 43 | With AHT     |
| 373 | 51 | M | 41 | 49 | Pre-HD AHT   |
| 374 | 66 | F | 40 | 58 | With AHT     |



|     |    |   |    |    |              |
|-----|----|---|----|----|--------------|
| 375 | 48 | M | 45 | 46 | Normotensive |
| 376 | 60 | M | 42 | 43 | Normotensive |
| 377 | 46 | F | 42 | 36 | Normotensive |
| 378 | 69 | M | 40 | 55 | With AHT     |
| 379 | 44 | F | 44 | 38 | Normotensive |
| 380 | 54 | M | 42 | 48 | With AHT     |
| 381 | 61 | F | 43 | 55 | Normotensive |
| 382 | 44 | M | 44 | 43 | Normotensive |
| 383 | 61 | M | 44 | 53 | Normotensive |
| 384 | 51 | F | 43 | 36 | Normotensive |
| 385 | 41 | M | 46 | 40 | Normotensive |
| 386 | 42 | F | 46 | 25 | Normotensive |
| 387 | 64 | F | 43 | 62 | Normotensive |
| 388 | 53 | M | 44 | 40 | Normotensive |
| 389 | 36 | F | 49 | 24 | Normotensive |
| 390 | 66 | F | 45 | 51 | With AHT     |
| 391 | 60 | M | 43 | 58 | With AHT     |
| 392 | 54 | F | 41 | 50 | Normotensive |
| 393 | 48 | F | 46 | 45 | Normotensive |
| 394 | 67 | F | 43 | 52 | Normotensive |
| 395 | 43 | F | 44 | 39 | Normotensive |
| 396 | 43 | F | 47 | 34 | Normotensive |
| 397 | 54 | F | 42 | 47 | Normotensive |
| 398 | 67 | F | 42 | 65 | Normotensive |
| 399 | 35 | M | 48 | 28 | Normotensive |
| 400 | 58 | M | 42 | 52 | With AHT     |
| 401 | 61 | F | 41 | 55 | With AHT     |
| 402 | 70 | F | 41 | 65 | Normotensive |
| 403 | 53 | M | 44 | 43 | Normotensive |
| 404 | 45 | M | 45 | 41 | Normotensive |
| 405 | 71 | F | 41 | 59 | Normotensive |
| 406 | 42 | M | 46 | 35 | Normotensive |
| 407 | 67 | F | 50 | 60 | Normotensive |
| 408 | 52 | M | 42 | 52 | Normotensive |
| 409 | 58 | M | 42 | 54 | Normotensive |
| 410 | 70 | F | 40 | 67 | Normotensive |
| 411 | 55 | M | 45 | 49 | Normotensive |
| 412 | 60 | F | 43 | 59 | With AHT     |
| 413 | 72 | M | 41 | 66 | With AHT     |
| 414 | 66 | F | 40 | 60 | With AHT     |
| 415 | 26 | M | 49 | 25 | Normotensive |
| 416 | 47 | F | 44 | 46 | Normotensive |
| 417 | 63 | M | 41 | 54 | With AHT     |
| 418 | 41 | M | 45 | 36 | Normotensive |
| 419 | 41 | M | 43 | 31 | With AHT     |
| 420 | 65 | M | 42 | 58 | Normotensive |
| 421 | 72 | M | 40 | 70 | Normotensive |
| 422 | 56 | M | 43 | 48 | With AHT     |

|     |    |   |    |    |              |
|-----|----|---|----|----|--------------|
| 423 | 36 | F | 43 | 34 | Normotensive |
| 424 | 46 | M | 46 | 39 | Normotensive |
| 425 | 43 | F | 47 | 30 | Normotensive |
| 426 | 61 | M | 42 | 48 | Normotensive |
| 427 | 45 | F | 41 | 36 | Normotensive |
| 428 | 47 | F | 44 | 39 | Normotensive |
| 429 | 44 | M | 43 | 41 | Normotensive |
| 430 | 56 | F | 45 | 44 | Normotensive |
| 431 | 50 | F | 46 | 35 | Normotensive |
| 432 | 54 | M | 47 | 49 | Normotensive |
| 433 | 41 | M | 47 | 36 | Normotensive |
| 434 | 60 | M | 41 | 57 | Normotensive |
| 435 | 43 | F | 46 | 36 | Normotensive |
| 436 | 39 | M | 41 | 38 | Normotensive |
| 437 | 46 | M | 46 | 37 | Normotensive |
| 438 | 60 | F | 41 | 53 | Pre-HD AHT   |
| 439 | 55 | F | 40 | 51 | Normotensive |
| 440 | 31 | F | 45 | 34 | Normotensive |
| 441 | 51 | M | 42 | 45 | Normotensive |
| 442 | 62 | M | 42 | 52 | Normotensive |
| 443 | 47 | M | 44 | 44 | Normotensive |
| 444 | 55 | M | 44 | 45 | Normotensive |
| 445 | 47 | F | 43 | 46 | Normotensive |
| 446 | 48 | M | 45 | 30 | Normotensive |
| 447 | 57 | F | 42 | 53 | Normotensive |
| 448 | 35 | F | 47 | 33 | Normotensive |
| 449 | 51 | F | 44 | 43 | Normotensive |
| 450 | 68 | M | 42 | 59 | Normotensive |
| 451 | 47 | F | 43 | 43 | Normotensive |
| 452 | 53 | F | 44 | 35 | Normotensive |
| 453 | 49 | M | 45 | 40 | Normotensive |
| 454 | 71 | F | 41 | 65 | Normotensive |
| 455 | 52 | M | 43 | 46 | Normotensive |
| 456 | 54 | F | 43 | 50 | Normotensive |
| 457 | 65 | F | 41 | 50 | Normotensive |
| 458 | 48 | M | 44 | 43 | Normotensive |
| 459 | 55 | F | 44 | 52 | Pre-HD AHT   |
| 460 | 40 | M | 45 | 39 | Normotensive |
| 461 | 38 | F | 44 | 38 | Normotensive |
| 462 | 62 | M | 42 | 59 | With AHT     |
| 463 | 42 | M | 47 | 40 | Normotensive |
| 464 | 57 | F | 42 | 55 | Pre-HD AHT   |
| 465 | 41 | M | 45 | 39 | With AHT     |
| 466 | 65 | M | 42 | 62 | With AHT     |
| 467 | 59 | M | 43 | 54 | Normotensive |
| 468 | 53 | M | 43 | 48 | Normotensive |
| 469 | 55 | F | 42 | 48 | Normotensive |
| 470 | 62 | F | 42 | 58 | Normotensive |

|     |    |   |    |    |              |
|-----|----|---|----|----|--------------|
| 471 | 59 | M | 44 | 57 | Normotensive |
| 472 | 58 | M | 44 | 50 | Pre-HD AHT   |
| 473 | 73 | M | 40 | 73 | Normotensive |
| 474 | 76 | F | 40 | 64 | Normotensive |
| 475 | 58 | F | 42 | 53 | With AHT     |
| 476 | 61 | F | 41 | 58 | Normotensive |
| 477 | 69 | M | 40 | 67 | Normotensive |
| 478 | 50 | F | 43 | 46 | Normotensive |
| 479 | 53 | M | 43 | 45 | Normotensive |
| 480 | 78 | M | 40 | 65 | Pre-HD AHT   |
| 481 | 59 | M | 42 | 56 | With AHT     |
| 482 | 74 | M | 40 | 67 | Normotensive |
| 483 | 35 | M | 49 | 31 | Normotensive |
| 484 | 51 | F | 45 | 48 | With AHT     |
| 485 | 69 | F | 43 | 62 | With AHT     |
| 486 | 58 | M | 42 | 57 | Normotensive |
| 487 | 40 | M | 44 | 39 | Normotensive |
| 488 | 38 | F | 46 | 29 | Normotensive |
| 489 | 68 | M | 41 | 65 | Normotensive |
| 490 | 60 | M | 42 | 53 | Normotensive |
| 491 | 69 | F | 41 | 66 | Normotensive |
| 492 | 46 | F | 49 | 31 | Normotensive |
| 493 | 51 | M | 43 | 39 | Normotensive |
| 494 | 63 | F | 40 | 55 | Normotensive |
| 495 | 49 | F | 45 | 47 | Normotensive |
| 496 | 54 | F | 43 | 54 | Normotensive |
| 497 | 61 | M | 42 | 49 | Normotensive |
| 498 | 68 | M | 41 | 61 | Normotensive |
| 499 | 52 | M | 44 | 40 | Normotensive |
| 500 | 60 | M | 42 | 50 | Normotensive |
| 501 | 60 | F | 43 | 57 | Normotensive |
| 502 | 82 | M | 41 | 71 | Normotensive |
| 503 | 45 | F | 43 | 47 | Normotensive |
| 504 | 41 | M | 48 | 34 | Normotensive |
| 505 | 63 | F | 41 | 60 | Normotensive |
| 506 | 36 | M | 50 | 32 | Normotensive |
| 507 | 49 | M | 45 | 38 | Normotensive |
| 508 | 60 | M | 43 | 57 | Normotensive |
| 509 | 46 | M | 44 | 37 | With AHT     |
| 510 | 49 | F | 43 | 47 | Normotensive |
| 511 | 56 | F | 43 | 47 | Normotensive |
| 512 | 69 | M | 44 | 67 | Normotensive |
| 513 | 52 | M | 45 | 48 | Normotensive |
| 514 | 41 | F | 47 | 41 | Normotensive |
| 515 | 43 | F | 44 | 38 | Normotensive |
| 516 | 87 | F | 40 | 70 | With AHT     |
| 517 | 48 | M | 43 | 49 | Normotensive |
| 518 | 35 | M | 49 | 33 | Normotensive |

|     |    |   |    |    |              |
|-----|----|---|----|----|--------------|
| 519 | 67 | M | 40 | 65 | Normotensive |
| 520 | 67 | M | 41 | 59 | Normotensive |
| 521 | 59 | F | 43 | 42 | Normotensive |
| 522 | 35 | M | 49 | 27 | Normotensive |
| 523 | 52 | F | 43 | 49 | Normotensive |
| 524 | 63 | F | 42 | 47 | Normotensive |
| 525 | 55 | M | 44 | 47 | With AHT     |
| 526 | 69 | M | 42 | 68 | Pre-HD AHT   |
| 527 | 59 | F | 41 | 54 | Normotensive |
| 528 | 49 | M | 42 | 41 | Normotensive |
| 529 | 58 | F | 45 | 53 | Normotensive |
| 530 | 74 | F | 40 | 61 | Normotensive |
| 531 | 55 | F | 43 | 47 | Normotensive |
| 532 | 57 | F | 42 | 51 | Normotensive |
| 533 | 52 | F | 44 | 51 | Normotensive |
| 534 | 39 | M | 47 | 39 | Normotensive |
| 535 | 27 | F | 47 | 25 | Normotensive |
| 536 | 54 | F | 44 | 49 | Normotensive |
| 537 | 52 | M | 42 | 43 | Normotensive |
| 538 | 40 | M | 48 | 39 | Normotensive |
| 539 | 51 | F | 44 | 41 | Normotensive |
| 540 | 56 | M | 41 | 55 | With AHT     |
| 541 | 61 | F | 41 | 58 | Normotensive |
| 542 | 54 | M | 43 | 54 | Normotensive |
| 543 | 40 | M | 47 | 36 | Normotensive |
| 544 | 66 | F | 42 | 54 | Normotensive |
| 545 | 55 | F | 42 | 51 | Normotensive |
| 546 | 56 | F | 43 | 46 | Normotensive |
| 547 | 65 | F | 40 | 58 | Normotensive |
| 548 | 79 | M | 40 | 59 | Normotensive |
| 549 | 32 | F | 47 | 30 | Normotensive |
| 550 | 40 | F | 45 | 38 | Normotensive |
| 551 | 60 | F | 40 | 55 | With AHT     |
| 552 | 67 | F | 41 | 63 | Normotensive |
| 553 | 54 | M | 43 | 53 | Normotensive |
| 554 | 56 | M | 42 | 53 | Normotensive |
| 555 | 47 | F | 46 | 43 | Normotensive |
| 556 | 54 | F | 45 | 44 | Normotensive |
| 557 | 64 | M | 42 | 57 | Normotensive |
| 558 | 64 | F | 41 | 60 | Pre-HD AHT   |
| 559 | 47 | M | 42 | 35 | Normotensive |
| 560 | 53 | M | 44 | 43 | Normotensive |
| 561 | 59 | F | 42 | 57 | Normotensive |
| 562 | 58 | F | 43 | 53 | Normotensive |
| 563 | 35 | F | 47 | 35 | Normotensive |
| 564 | 50 | F | 44 | 45 | Normotensive |
| 565 | 48 | M | 45 | 48 | Normotensive |
| 566 | 58 | M | 40 | 51 | Normotensive |

|     |    |   |    |    |              |
|-----|----|---|----|----|--------------|
| 567 | 37 | F | 46 | 30 | Normotensive |
| 568 | 53 | F | 43 | 43 | With AHT     |
| 569 | 50 | M | 44 | 42 | Normotensive |
| 570 | 29 | F | 48 | 21 | Normotensive |
| 571 | 57 | M | 43 | 53 | Normotensive |
| 572 | 52 | F | 43 | 38 | Normotensive |
| 573 | 43 | M | 46 | 41 | Normotensive |
| 574 | 49 | F | 40 | 49 | Normotensive |
| 575 | 45 | F | 46 | 40 | Normotensive |
| 576 | 51 | F | 43 | 42 | Normotensive |
| 577 | 63 | M | 40 | 49 | Normotensive |
| 578 | 57 | F | 44 | 55 | Normotensive |
| 579 | 32 | M | 49 | 30 | Normotensive |
| 580 | 57 | F | 43 | 56 | Normotensive |
| 581 | 67 | M | 40 | 63 | With AHT     |
| 582 | 44 | M | 44 | 42 | Normotensive |
| 583 | 40 | F | 47 | 33 | Normotensive |
| 584 | 34 | M | 46 | 24 | Normotensive |
| 585 | 62 | M | 42 | 56 | With AHT     |
| 586 | 55 | M | 42 | 45 | Normotensive |
| 587 | 38 | F | 43 | 36 | Normotensive |
| 588 | 62 | M | 42 | 59 | Normotensive |
| 589 | 48 | F | 46 | 40 | Normotensive |
| 590 | 67 | M | 42 | 57 | Normotensive |
| 591 | 56 | M | 43 | 50 | Normotensive |
| 592 | 60 | F | 41 | 61 | Pre-HD AHT   |
| 593 | 60 | M | 42 | 53 | Normotensive |
| 594 | 57 | M | 42 | 48 | Normotensive |
| 595 | 50 | F | 41 | 44 | Normotensive |
| 596 | 53 | M | 44 | 38 | Normotensive |
| 597 | 52 | M | 44 | 45 | Normotensive |
| 598 | 58 | M | 41 | 42 | With AHT     |
| 599 | 52 | M | 44 | 47 | Normotensive |
| 600 | 42 | M | 45 | 42 | Normotensive |
| 601 | 35 | M | 47 | 34 | Normotensive |
| 602 | 56 | F | 43 | 46 | Normotensive |
| 603 | 61 | F | 40 | 52 | Normotensive |
| 604 | 67 | F | 44 | 64 | Normotensive |
| 605 | 54 | F | 41 | 56 | Normotensive |
| 606 | 59 | F | 43 | 58 | Normotensive |
| 607 | 57 | F | 42 | 52 | Normotensive |
| 608 | 36 | F | 47 | 35 | Normotensive |
| 609 | 56 | F | 42 | 50 | Normotensive |
| 610 | 66 | F | 40 | 63 | Normotensive |
| 611 | 56 | F | 42 | 55 | Normotensive |
| 612 | 41 | M | 50 | 32 | Normotensive |
| 613 | 46 | M | 44 | 43 | Normotensive |
| 614 | 51 | M | 46 | 49 | Normotensive |

|     |    |   |    |    |              |
|-----|----|---|----|----|--------------|
| 615 | 55 | M | 42 | 46 | Normotensive |
| 616 | 59 | F | 43 | 44 | Normotensive |
| 617 | 38 | F | 47 | 30 | Normotensive |
| 618 | 52 | F | 43 | 47 | Pre-HD AHT   |
| 619 | 56 | M | 40 | 47 | Normotensive |
| 620 | 48 | M | 44 | 42 | Normotensive |
| 621 | 53 | M | 43 | 46 | With AHT     |
| 622 | 53 | F | 41 | 50 | Pre-HD AHT   |
| 623 | 53 | M | 42 | 40 | Normotensive |
| 624 | 44 | M | 49 | 39 | Normotensive |
| 625 | 49 | M | 42 | 44 | Normotensive |
| 626 | 30 | M | 48 | 25 | Normotensive |
| 627 | 43 | F | 47 | 32 | Normotensive |
| 628 | 53 | F | 42 | 53 | Normotensive |
| 629 | 73 | F | 41 | 61 | Normotensive |
| 630 | 64 | F | 41 | 57 | Normotensive |
